# Supplementary material for: Bioethanol: A New Synergy between Marine Chitinases from Bacillus haynesii and Ethanol Production by Mucor circinelloides
Source: MDPI journal article supplement (doi:10.3390/fermentation9010040), 2023-01-02
Supplement: s1 [file s1]

Archive with 1 entries (1 files):
- fermentation-2082675-supplementary.pdf
