# Supplementary material for: Bioethanol: A New Synergy between Marine Chitinases from Bacillus haynesii and Ethanol Production by Mucor circinelloides
Source: MDPI journal article supplement (doi:10.3390/fermentation9010040), 2023-01-02
Supplement: s1 [file s1 › fermentation-2082675-supplementary.pdf]

Supplementary Table S1: Biochemical characterization of strain SEDS2

| Biochemical Characteristics | Results                                           |
|-----------------------------|---------------------------------------------------|
| Gram staining               | +                                                 |
| Motility                    | +                                                 |
| Indole                      | -                                                 |
| MR                          | +                                                 |
| Starch hydrolysis           | +                                                 |
| Catalase test               | +                                                 |
| Citrate test                | -                                                 |
| Triple sugar ion test       | Glucose fermentation, No gas, No H <sub>2</sub> S |

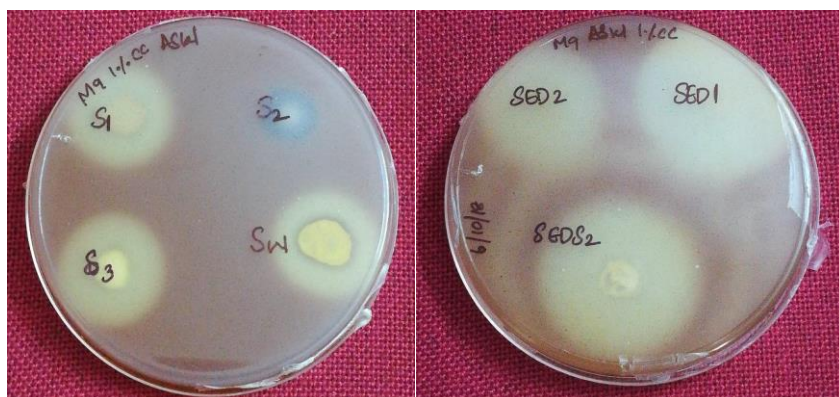

Supplementary Figure S1. Bacterial isolates plated on colloidal chitin agar plate flooded with Lugol's iodine

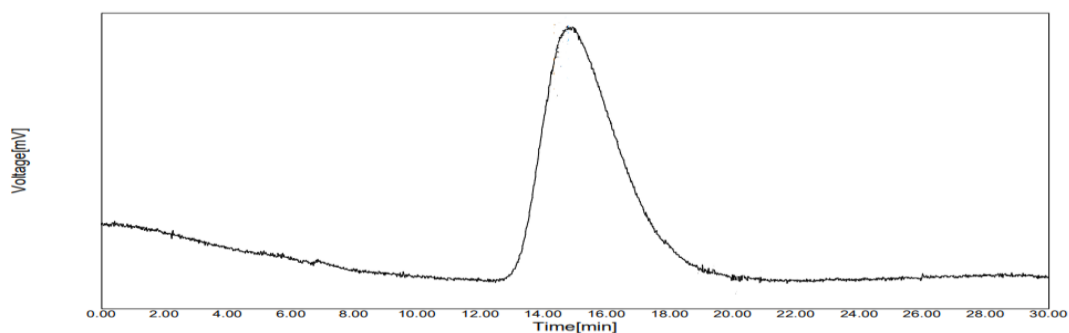

Supplementary Figure S2. Gas chromatogram of standard 1% (v/v) ethanol
